# Supplementary material
Source: PubMed Central journal article supplement (PMC2730213)

**Supplementary Material for “The Unfolded State of the C-terminal Domain of the Ribosomal Protein L9 Contains Significant Secondary Structure in the Absence of Denaturant but is No More Compact than the Urea Unfolded State”**

Bing Shan, Shibani Bhattacharya, David Eliezer and Daniel P Raleigh

**Table-S1.** Chemical shift assignments for the pH 2.0 unfolded state of CTL9 at 25 °C. Chemical shifts were referenced to DSS.

**Table-S2.** Chemical shift assignments for the pH 2.5, 7.6 M urea unfolded state of CTL9 at 25 °C. Chemical shifts were referenced to DSS.

**Table-S3.**  $^{15}\text{N}$  R2 relaxation rates of the pH 2.0 and pH 2.5, 7.6 M urea unfolded states of CTL9 at 25 °C.

**Figure-S1.** SSP analysis of the pH 2.0 unfolded state of CTL9 calculated using only  $^{13}\text{C}_\alpha$  and  $^{13}\text{C}_\beta$  chemical shifts.

**Figure-S2.** AGADIR analysis of the primary sequence of CTL9 at pH 2.0, 298 °K.

**Table-S1** CTL9 backbone and  $^{13}\text{C}_\beta$  and  $^1\text{H}_\beta$  assignments at pH 2.0

| Residue | NH   | N      | CA    | CB    | CO     | HA   | HB   | HB'  |
|---------|------|--------|-------|-------|--------|------|------|------|
| A58     |      |        | 51.92 | 19.18 | 173.49 | 4.10 | 1.56 | --   |
| A59     | 8.61 | 123.73 | 52.68 | 19.15 | 177.65 | 4.36 | 1.41 | --   |
| E60     | 8.46 | 120.28 | 55.99 | 28.73 | 176.06 | 4.36 | 2.05 | --   |
| E61     | 8.43 | 121.88 | 55.99 | 28.56 | 176.18 | 4.38 | 2.06 | --   |
| L62     | 8.28 | 123.78 | 55.73 | 42.53 | 177.65 | 4.31 | 1.64 | --   |
| A63     | 8.22 | 123.83 | 53.20 | 18.91 | 178.18 | 4.24 | 1.41 | --   |
| N64     | 8.30 | 117.35 | 53.70 | 38.62 | 175.76 | 4.62 | 2.83 | --   |
| A65     | 8.12 | 123.98 | 53.70 | 18.93 | 178.64 | 4.21 | 1.44 | --   |
| K66     | 8.13 | 119.44 | 57.50 | 32.62 | 177.35 | 4.18 | 1.82 | --   |
| K67     | 8.03 | 121.32 | 57.00 | 32.63 | 177.30 | 4.24 | 1.82 | --   |
| L68     | 8.08 | 122.32 | 55.99 | 42.27 | 177.94 | 4.29 | 1.63 | --   |
| K69     | 8.15 | 121.26 | 57.28 | 32.62 | 177.29 | 4.21 | 1.84 | --   |
| E70     | 8.17 | 120.22 | 56.75 | 28.57 | 176.65 | 4.27 | 2.08 | --   |
| Q71     | 8.30 | 121.01 | 56.74 | 29.08 | 176.51 | 4.29 | 2.09 | --   |
| L72     | 8.18 | 122.61 | 55.74 | 42.27 | 177.88 | 4.30 | 1.66 | --   |
| E73     | 8.19 | 120.48 | 56.23 | 28.57 | 176.12 | 4.34 | 2.07 | --   |
| K74     | 8.16 | 121.95 | 56.62 | 32.89 | 176.46 | 4.30 | 1.80 | --   |
| L75     | 8.17 | 123.20 | 55.35 | 42.53 | 177.53 | 4.43 | 1.64 | --   |
| T76     | 8.16 | 116.09 | 62.09 | 69.95 | 174.31 | 4.73 | 4.31 | --   |
| V77     | 8.15 | 123.11 | 62.33 | 32.89 | 176.01 | 4.23 | 2.08 | --   |
| T78     | 8.30 | 119.64 | 61.82 | 69.95 | 174.07 | 4.36 | 4.10 | --   |
| I79     | 8.29 | 125.96 | 58.53 | 38.72 | 174.45 | --   | --   | --   |
| P80     | --   | --     | 63.35 | 32.12 | 176.61 | 4.38 | 2.30 | 1.90 |
| A81     | 8.32 | 124.48 | 52.54 | 19.17 | 177.94 | 4.28 | 1.39 | --   |
| K82     | 8.21 | 120.50 | 56.23 | 33.12 | 176.36 | 4.29 | 1.78 | --   |
| A83     | 8.26 | 125.38 | 52.69 | 19.18 | 178.29 | 4.30 | 1.39 | --   |
| G84     | 8.38 | 108.31 | 45.33 |       | 174.42 | 3.97 | --   | --   |
| E85     | 8.24 | 119.73 | 55.98 | 28.71 | 176.82 | 4.40 | 2.17 | 2.01 |
| G86     | 8.53 | 110.01 | 45.58 |       | 174.77 | 3.97 | --   | --   |
| G87     | 8.25 | 108.62 | 45.32 |       | 174.25 | 3.96 | --   | --   |
| R88     | 8.09 | 120.39 | 56.36 | 30.60 | 176.18 | 4.30 | 1.76 | --   |
| L89     | 8.22 | 122.93 | 55.23 | 42.28 | 177.12 | 4.30 | 1.51 | --   |
| F90     | 8.22 | 120.81 | 58.02 | 39.74 | 176.27 | 4.60 | 3.17 | 3.03 |
| G91     | 8.30 | 110.33 | 45.24 |       | 174.07 | 3.94 | --   | --   |
| S92     | 8.16 | 115.70 | 58.27 | 64.11 | 174.74 | 4.49 | 3.89 | --   |
| I93     | 8.25 | 122.54 | 61.58 | 38.72 | 176.70 | 4.29 | 1.93 | --   |
| T94     | 8.18 | 117.44 | 62.08 | 69.95 | 174.95 | 4.34 | --   | --   |
| S95     | 8.31 | 117.95 | 59.28 | 63.71 | 175.19 | 4.42 | 3.92 | --   |
| K96     | 8.27 | 123.33 | 57.25 | 32.88 | 176.82 | 4.28 | 1.80 | --   |
| Q97     | 8.21 | 120.88 | 56.87 | 29.70 | 177.06 | 4.26 | 2.07 | --   |
| I98     | 8.12 | 122.24 | 62.33 | 38.47 | 176.83 | 4.05 | 1.87 | --   |
| A99     | 8.26 | 126.44 | 53.45 | 18.91 | 178.76 | 4.26 | 1.43 | --   |
| E100    | 8.27 | 119.09 | 56.85 | 28.57 | 177.09 | 4.29 | 2.09 | --   |
| S101    | 8.23 | 116.61 | 59.29 | 63.60 | 175.36 | 4.40 | 3.95 | --   |
| L102    | 8.17 | 123.55 | 56.39 | 42.14 | 178.35 | 4.28 | 1.69 | 1.60 |
| Q103    | 8.13 | 119.81 | 56.76 | 28.83 | 176.65 | 4.23 | 2.08 | --   |
| A104    | 8.10 | 123.90 | 53.18 | 18.92 | 178.29 | 4.06 | 1.41 | --   |

|      |      |        |       |       |        |      |      |      |
|------|------|--------|-------|-------|--------|------|------|------|
| Q105 | 8.15 | 118.42 | 56.49 | 29.07 | 176.42 | 4.22 | 2.05 | --   |
| H106 | 8.38 | 118.49 | 55.58 | 28.82 | 175.07 | 4.70 | 3.35 | 3.21 |
| G107 | 8.38 | 109.38 | 45.58 |       | 174.13 | 3.96 | --   | --   |
| L108 | 8.04 | 121.77 | 55.48 | 42.53 | 177.59 | 4.34 | 1.61 | --   |
| K109 | 8.32 | 122.31 | 56.75 | 32.63 | 176.65 | 4.34 | 1.80 | --   |
| L110 | 8.17 | 123.22 | 55.47 | 42.53 | 177.18 | 4.33 | 1.60 | --   |
| D111 | 8.41 | 120.16 | 53.19 | 38.21 | 175.36 | 4.67 | 2.91 | --   |
| K112 | 8.26 | 122.21 | 57.00 | 32.88 | 176.83 | 4.25 | 1.80 | --   |
| R113 | 8.18 | 121.47 | 56.75 | 30.59 | 176.60 | 4.26 | 1.82 | --   |
| K114 | 8.22 | 122.36 | 57.01 | 32.89 | 177.06 | 4.24 | 1.80 | --   |
| I115 | 8.08 | 122.55 | 61.58 | 38.62 | 176.42 | 4.08 | 1.84 | --   |
| E116 | 8.33 | 124.00 | 55.99 | 28.56 | 176.59 | 4.37 | 2.06 | --   |
| L117 | 8.26 | 123.80 | 55.48 | 42.28 | 177.62 | 4.33 | 1.63 | --   |
| A118 | 8.29 | 124.30 |       | 19.18 | 178.35 | 4.24 | 1.41 | --   |
| D119 | 8.30 | 117.34 | 53.45 | 37.95 | 175.42 | 4.62 | 2.91 | --   |
| A120 | 8.06 | 124.27 | 53.19 | 18.92 | 178.09 | 4.30 | 1.41 | --   |
| I121 | 7.95 | 119.39 | 61.82 | 38.46 | 176.83 | 4.06 | 1.87 | --   |
| R122 | 8.18 | 124.50 | 56.50 | 30.60 | 176.24 | 4.29 | 1.80 | --   |
| A123 | 8.17 | 124.78 | 52.68 | 19.04 | 177.82 | 4.29 | 1.39 | --   |
| L124 | 8.10 | 121.14 | 55.48 | 42.53 | 178.06 | 4.29 | 1.65 | 1.54 |
| G125 | 8.24 | 108.69 | 45.32 |       | 173.90 | 3.92 | --   | --   |
| Y126 | 7.95 | 119.82 | 58.02 | 38.73 | 175.95 | 4.63 | 3.03 | --   |
| T127 | 8.03 | 115.91 | 61.57 | 69.95 | 173.66 | 4.32 | 4.14 | --   |
| N128 | 8.36 | 121.55 | 53.19 | 38.98 | 174.60 | 4.70 | 2.76 | --   |
| V129 | 8.04 | 122.19 | 60.06 | 32.64 | 174.36 | --   | 2.02 | --   |
| P130 | --   | --     | 63.35 | 32.03 | 177.06 | 4.44 | 2.29 | 1.85 |
| V131 | 8.17 | 120.98 | 62.58 | 32.88 | 176.18 | 4.04 | 2.03 | --   |
| K132 | 8.33 | 125.39 | 55.99 | 32.89 | 176.12 | 4.32 | 1.73 | --   |
| L133 | 8.21 | 123.71 | 55.22 | 42.54 | 176.83 | 4.28 | 1.58 | 1.44 |
| H134 | 8.50 | 119.29 |       |       | 172.20 | --   | 3.19 | 3.11 |
| P135 | --   | --     | 63.35 | 32.11 | 176.82 | 4.44 | 2.29 | 1.92 |
| E136 | 8.53 | 121.21 | 55.74 | 28.82 | 176.09 | 4.43 | 2.06 | --   |
| V137 | 8.29 | 122.32 | 62.34 | 32.87 | 176.30 | 4.20 | 2.09 | --   |
| T138 | 8.24 | 118.82 | 62.08 | 69.95 | 174.25 | 4.32 | 4.19 | --   |
| A139 | 8.36 | 127.04 | 52.68 | 19.17 | 177.77 | 4.39 | 1.42 | --   |
| T140 | 8.12 | 114.08 | 62.08 | 69.94 | 174.48 | 4.28 | 4.17 | --   |
| L141 | 8.18 | 125.11 | 55.36 | 42.53 | 177.12 | 4.37 | 1.61 | --   |
| K142 | 8.31 | 122.98 | 56.24 | 32.88 | 176.30 | 4.35 | 1.75 | --   |
| V143 | 8.00 | 120.99 | 62.33 | 32.88 | 175.83 | 4.08 | 2.00 | --   |
| H144 | 8.65 | 122.86 | 55.22 | 28.82 | 174.13 | 4.76 | 3.19 | --   |
| V145 | 8.28 | 122.98 | 62.33 | 32.89 | 176.10 | 4.18 | 2.06 | --   |
| T146 | 8.33 | 119.12 | 62.08 | 69.94 | 174.25 | 4.34 | 4.16 | --   |
| E147 | 8.41 | 123.41 | 55.62 | 28.82 | 175.65 | 4.42 | 2.11 | 2.00 |
| Q148 | 8.45 | 122.53 | 55.99 | 29.58 | 175.77 | 4.36 | 2.05 |      |
| K149 | 8.49 | 123.97 | 55.73 | 32.63 | 178.41 |      | 1.76 |      |

**Table-S2 CTL9 backbone and  $^{13}\text{C}_\beta$  and  $^1\text{H}_\beta$  assignments at pH 2.5, in 7.6 M urea**

| Residue | NH   | N      | CA    | CB    | CO     | HA   | HB   | HB'  |
|---------|------|--------|-------|-------|--------|------|------|------|
| A58     |      |        | 51.88 | 19.08 | 173.46 | 4.07 | 1.49 |      |
| A59     | 8.58 | 123.90 | 52.47 | 19.06 | 177.35 | 4.32 | 1.34 |      |
| E60     | 8.40 | 120.23 | 55.99 | 29.02 | 175.87 | 4.31 | 1.96 |      |
| E61     | 8.44 | 122.19 | 55.98 | 29.02 | 175.78 |      |      |      |
| L62     |      |        |       |       |        |      |      |      |
| A63     |      |        | 52.48 | 19.07 | 177.52 | 4.23 | 1.31 |      |
| N64     | 8.31 | 117.78 | 53.06 | 38.99 | 175.01 | 4.64 | 2.75 |      |
| A65     | 8.12 | 124.43 | 53.06 | 19.06 | 177.50 | 4.23 | 1.32 |      |
| K66     | 8.21 | 120.45 | 56.58 | 33.14 | 176.56 | 4.20 | 1.73 |      |
| K67     | 8.24 | 122.76 | 56.57 | 33.14 | 176.48 |      |      |      |
| L68     |      |        | 54.83 | 42.51 | 177.35 | 4.29 | 1.51 |      |
| K69     | 8.43 | 122.77 | 56.59 | 33.13 | 176.53 | 4.23 | 1.71 |      |
| E70     | 8.35 | 121.89 | 56.02 | 29.02 | 175.87 | 4.29 | 1.96 |      |
| Q71     | 8.49 | 122.32 | 55.98 | 29.61 | 175.76 |      |      |      |
| L72     |      |        | 55.42 | 42.22 | 177.59 | 4.26 | 1.55 |      |
| E73     | 8.25 | 120.53 | 55.42 | 29.58 | 175.95 | 4.27 | 1.93 |      |
| K74     | 8.38 | 123.30 | 56.00 | 33.14 | 176.14 |      |      |      |
| L75     |      |        | 54.82 | 42.51 | 177.37 | 4.41 | 1.54 |      |
| T76     | 8.27 | 116.53 | 61.87 | 70.06 | 174.27 | 4.32 | 4.12 |      |
| V77     | 8.19 | 122.81 | 61.86 | 33.13 | 175.96 | 4.18 | 2.00 |      |
| T78     | 8.26 | 119.04 | 61.86 | 70.06 | 174.04 | 4.33 | 4.05 |      |
| I79     | 8.26 | 125.23 | 58.35 | 39.00 | 174.31 |      |      |      |
| P80     |      |        | 63.03 | 31.96 | 176.44 | 4.32 | 2.21 | 1.83 |
| A81     | 8.30 | 124.61 | 53.04 | 19.07 | 177.69 | 4.23 | 1.32 |      |
| K82     | 8.23 | 120.79 | 56.58 | 33.14 | 176.27 |      |      |      |
| A83     | 8.31 | 125.53 | 52.50 | 19.06 | 178.06 | 4.27 | 1.34 |      |
| G84     | 8.32 | 108.33 | 45.44 |       | 174.17 | 3.94 |      |      |
| E85     | 8.20 | 119.58 | 56.00 | 29.02 | 176.54 | 4.35 | 2.10 | 1.94 |
| G86     | 8.45 | 109.90 | 45.45 |       | 174.43 | 3.94 |      |      |
| G87     | 8.20 | 108.47 | 45.43 |       | 173.93 | 3.93 |      |      |
| R88     | 8.14 | 120.53 | 56.27 | 30.80 | 176.03 | 4.25 | 1.66 |      |
| L89     | 8.25 | 123.37 | 54.82 | 42.52 | 176.93 | 4.26 | 1.42 |      |
| F90     | 8.31 | 121.17 | 57.76 | 39.60 | 176.15 | 4.59 | 3.02 |      |
| G91     | 8.30 | 110.31 | 45.43 |       | 173.80 | 3.92 |      |      |
| S92     | 8.17 | 115.67 | 58.34 | 64.20 | 174.60 | 4.48 | 3.79 |      |
| I93     | 8.27 | 122.58 | 61.27 | 38.85 | 176.41 | 4.23 | 1.83 |      |
| T94     | 8.17 | 117.51 | 61.84 | 70.06 | 174.60 | 4.25 | 4.23 |      |
| S95     | 8.26 | 118.16 | 58.43 | 64.18 | 174.60 | 4.39 | 3.82 |      |
| K96     | 8.31 | 123.42 | 56.57 | 33.13 | 176.43 | 4.24 | 1.71 |      |
| Q97     | 8.30 | 121.56 | 56.58 | 29.61 | 176.16 | 4.26 | 1.95 |      |
| I98     | 8.16 | 122.62 | 61.27 | 38.97 | 176.10 | 4.07 | 1.78 |      |
| A99     | 8.31 | 127.69 | 53.05 | 19.05 | 177.76 | 4.26 | 1.33 |      |
| E100    | 8.27 | 119.87 | 56.00 | 29.03 | 176.28 | 4.29 | 1.99 |      |
| S101    | 8.30 | 116.86 | 58.34 | 63.84 | 174.77 |      |      |      |
| L102    |      |        |       |       |        |      |      |      |
| Q103    |      |        | 55.99 | 30.81 | 175.77 | 4.28 | 1.72 |      |
| A104    | 8.26 | 125.74 | 52.47 | 19.07 | 177.44 | 4.20 | 1.43 |      |

|      |      |        |       |       |        |      |      |      |
|------|------|--------|-------|-------|--------|------|------|------|
| Q105 | 8.23 | 119.24 | 55.99 | 29.61 | 176.00 | 4.23 | 1.98 |      |
| H106 | 8.48 | 119.09 | 55.39 | 29.02 | 174.73 | 4.70 | 3.18 |      |
| G107 | 8.40 | 109.79 | 45.42 |       | 173.66 | 3.95 |      |      |
| L108 | 8.10 | 121.87 | 55.10 | 42.52 | 177.21 | 4.29 | 1.49 |      |
| K109 | 8.46 | 123.36 | 56.24 | 33.11 | 176.20 |      |      |      |
| L110 |      |        | 54.82 | 42.50 | 176.94 | 4.30 | 1.42 |      |
| D111 | 8.56 | 120.91 | 53.06 | 38.39 | 175.03 | 4.25 | 2.81 |      |
| K112 | 8.32 | 122.67 | 56.57 | 33.13 | 176.29 | 4.68 | 1.70 |      |
| R113 | 8.32 | 122.67 | 55.99 | 29.60 | 176.16 | 4.24 | 1.73 |      |
| K114 | 8.42 | 123.87 | 56.58 | 32.56 | 176.27 | 4.25 | 1.66 |      |
| I115 | 8.25 | 123.37 | 61.25 | 39.00 | 175.93 | 4.23 | 1.72 |      |
| E116 | 8.31 | 125.53 | 55.99 | 30.81 | 175.75 |      |      |      |
| L117 |      |        |       |       |        |      |      |      |
| A118 |      |        | 52.45 | 19.06 | 177.55 | 4.23 | 1.32 |      |
| D119 | 8.33 | 117.99 | 53.05 | 38.39 | 174.78 |      |      |      |
| A120 |      |        | 52.45 | 19.06 | 177.43 | 4.26 | 1.31 |      |
| I121 | 8.00 | 120.10 | 61.25 | 38.97 | 176.19 | 4.08 | 1.73 |      |
| R122 | 8.42 | 125.23 | 55.40 | 29.03 | 175.65 | 4.37 | 1.95 |      |
| A123 | 8.33 | 124.81 | 53.06 | 19.07 | 177.50 | 4.27 | 1.31 |      |
| L124 | 8.19 | 121.84 | 55.39 | 42.50 | 177.74 | 4.25 | 1.51 |      |
| G125 | 8.26 | 109.05 | 45.42 |       | 173.59 | 3.85 |      |      |
| Y126 | 8.02 | 119.92 | 57.75 | 39.00 | 175.94 | 4.60 | 2.93 |      |
| T127 | 8.09 | 115.73 | 61.83 | 70.06 | 173.74 | 4.28 | 4.09 |      |
| N128 | 8.38 | 121.59 | 53.06 | 38.99 | 174.59 | 4.68 | 2.71 |      |
| V129 | 8.02 | 121.46 | 60.01 | 32.38 | 174.23 |      |      |      |
| P130 |      |        | 63.02 | 31.96 | 176.66 | 4.39 | 2.19 | 1.77 |
| V131 | 8.13 | 120.98 | 62.74 | 32.53 | 176.01 | 4.02 | 1.92 |      |
| K132 | 8.32 | 125.60 | 55.99 | 33.13 | 175.70 |      |      |      |
| L133 |      |        | 54.82 | 42.51 | 177.01 | 4.23 | 1.33 |      |
| H134 | 8.64 | 119.69 | 53.06 | 28.43 | 172.34 |      |      |      |
| P135 |      |        | 63.01 | 31.98 | 176.61 | 4.39 | 2.23 | 1.86 |
| E136 | 8.53 | 121.46 | 55.99 | 29.03 | 175.92 | 4.39 | 1.96 |      |
| V137 | 8.27 | 122.07 | 62.44 | 33.11 | 176.20 | 4.16 | 1.92 |      |
| T138 | 8.22 | 118.41 | 61.53 | 70.06 | 174.18 | 4.30 | 4.16 |      |
| A139 | 8.28 | 126.75 | 52.49 | 19.43 | 177.57 | 4.37 | 1.34 |      |
| T140 | 8.10 | 113.99 | 61.85 | 70.06 | 174.40 | 4.16 | 4.14 |      |
| L141 | 8.20 | 125.15 | 54.84 | 42.52 | 177.00 | 4.27 | 1.50 |      |
| K142 | 8.39 | 123.43 | 55.99 | 33.12 | 176.28 | 4.31 | 1.68 |      |
| V143 | 8.09 | 121.30 | 62.42 | 33.12 | 175.79 | 4.05 | 1.93 |      |
| H144 | 8.67 | 123.03 | 54.85 | 29.03 | 174.11 | 4.73 | 3.13 |      |
| V145 | 8.31 | 123.19 | 62.43 | 33.13 | 175.98 | 4.18 | 2.00 |      |
| T146 | 8.31 | 118.92 | 61.84 | 69.80 | 174.27 | 4.27 | 4.25 |      |
| E147 | 8.38 | 123.30 | 55.99 | 29.01 | 176.16 | 4.35 | 1.95 |      |
| Q148 | 8.46 | 122.51 | 55.99 | 29.61 | 175.69 | 4.29 | 1.97 |      |
| K149 | 8.46 | 123.73 | 55.98 | 32.55 | 178.57 |      |      |      |

**Table-S3  $^{15}\text{N}$  R2 relaxation rates for the pH 2.0 and pH 2.5, 7.6 M urea unfolded states of CTL9 and calculated R2 rates using random coil model**

| Residue | R2 urea ( $\text{sec}^{-1}$ ) | R2 pH 2.0 ( $\text{sec}^{-1}$ ) | Model values ( $\text{sec}^{-1}$ ) |
|---------|-------------------------------|---------------------------------|------------------------------------|
| A58     |                               |                                 | 1.6                                |
| A59     | 1.1 ± 0.1                     | 0.93 ± 0.02                     | 1.8                                |
| E60     | 1.9 ± 0.1                     | 1.7 ± 0.02                      | 1.9                                |
| E61     |                               | 1.1 ± 0.02                      | 2.0                                |
| L62     |                               | 1.8 ± 0.03                      | 2.2                                |
| A63     |                               | 4.4 ± 0.04                      | 2.3                                |
| N64     | 2.5 ± 0.03                    | 1.9 ± 0.02                      | 2.3                                |
| A65     | 2.1 ± 0.2                     | 2.8 ± 0.02                      | 2.4                                |
| K66     | 3.2 ± 0.03                    | 2.6 ± 0.03                      | 2.5                                |
| K67     | 3.5 ± 0.04                    | 3.1 ± 0.03                      | 2.5                                |
| L68     |                               | 3.7 ± 0.04                      | 2.6                                |
| K69     | 3.0 ± 0.03                    | 3.1 ± 0.03                      | 2.6                                |
| E70     | 4.0 ± 0.04                    | 3.6 ± 0.04                      | 2.7                                |
| Q71     | 3.7 ± 0.04                    | 3.3 ± 0.03                      | 2.7                                |
| L72     |                               | 3.6 ± 0.04                      | 2.8                                |
| E73     | 3.2 ± 0.03                    |                                 | 2.8                                |
| K74     |                               | 3.1 ± 0.04                      | 2.8                                |
| L75     |                               | 3.2 ± 0.03                      | 2.8                                |
| T76     | 3.4 ± 0.02                    | 2.6 ± 0.03                      | 2.9                                |
| V77     | 3.2 ± 0.02                    | 3.1 ± 0.02                      | 2.9                                |
| T78     | 3.3 ± 0.01                    | 3.6 ± 0.04                      | 2.9                                |
| I79     | 4.1 ± 0.1                     | 3.8 ± 0.03                      | 2.9                                |
| P80     |                               |                                 | 2.9                                |
| A81     |                               | 2.0 ± 0.03                      | 2.9                                |
| K82     |                               |                                 | 2.9                                |
| A83     |                               | 2.3 ± 0.03                      | 2.9                                |
| G84     | 3.0 ± 0.04                    | 2.7 ± 0.03                      | 2.9                                |
| E85     | 3.0 ± 0.04                    | 2.1 ± 0.03                      | 3.0                                |
| G86     | 2.8 ± 0.1                     | 1.6 ± 0.03                      | 3.0                                |
| G87     | 2.5 ± 0.05                    | 1.8 ± 0.02                      | 3.0                                |
| R88     | 2.8 ± 0.03                    | 1.5 ± 0.02                      | 3.0                                |
| L89     |                               | 2.2 ± 0.03                      | 3.0                                |
| F90     | 2.5 ± 0.04                    | 3.1 ± 0.02                      | 3.0                                |
| G91     | 2.5 ± 0.05                    | 2.2 ± 0.02                      | 3.0                                |
| S92     | 2.4 ± 0.02                    | 2.3 ± 0.02                      | 3.0                                |
| I93     | 3.7 ± 0.04                    |                                 | 3.0                                |
| T94     | 4.4 ± 0.05                    | 3.0 ± 0.03                      | 3.0                                |
| S95     |                               | 4.2 ± 0.03                      | 3.0                                |
| K96     |                               | 3.8 ± 0.03                      | 3.0                                |
| Q97     | 3.2 ± 0.05                    |                                 | 3.0                                |
| I98     | 4.3 ± 0.06                    | 4.4 ± 0.04                      | 3.0                                |
| A99     | 4.4 ± 0.1                     | 4.7 ± 0.04                      | 3.0                                |
| E100    | 3.5 ± 0.02                    | 4.7 ± 0.04                      | 3.0                                |
| S101    | 4.3 ± 0.04                    | 4.0 ± 0.03                      | 3.0                                |

|      |                |                |     |
|------|----------------|----------------|-----|
| L102 |                | $1.9 \pm 0.03$ | 3.0 |
| Q103 |                | $3.5 \pm 0.03$ | 3.0 |
| A104 | $3.4 \pm 0.04$ |                | 3.0 |
| Q105 | $3.5 \pm 0.03$ | $2.6 \pm 0.03$ | 3.0 |
| H106 | $3.4 \pm 0.03$ | $2.8 \pm 0.03$ | 3.0 |
| G107 | $3.4 \pm 0.1$  | $3.7 \pm 0.03$ | 3.0 |
| L108 | $4.2 \pm 0.04$ | $2.9 \pm 0.03$ | 3.0 |
| K109 | $3.4 \pm 0.03$ |                | 3.0 |
| L110 |                |                | 3.0 |
| D111 | $3.4 \pm 0.02$ | $2.9 \pm 0.03$ | 3.0 |
| K112 |                | $3.0 \pm 0.03$ | 3.0 |
| R113 |                | $5.0 \pm 0.05$ | 3.0 |
| K114 | $4.7 \pm 0.03$ | $3.0 \pm 0.03$ | 3.0 |
| I115 |                | $4.2 \pm 0.03$ | 3.0 |
| E116 |                | $4.9 \pm 0.04$ | 3.0 |
| L117 |                |                | 3.0 |
| A118 |                | $1.7 \pm 0.02$ | 3.0 |
| D119 | $3.0 \pm 0.02$ |                | 3.0 |
| A120 |                | $3.8 \pm 0.03$ | 3.0 |
| I121 | $3.4 \pm 0.03$ | $3.5 \pm 0.03$ | 3.0 |
| R122 | $4.3 \pm 0.05$ | $3.3 \pm 0.03$ | 3.0 |
| A123 |                | $3.2 \pm 0.03$ | 2.9 |
| L124 | $2.9 \pm 0.05$ | $3.2 \pm 0.03$ | 2.9 |
| G125 | $3.6 \pm 0.05$ | $2.6 \pm 0.03$ | 2.9 |
| Y126 | $3.8 \pm 0.05$ | $3.2 \pm 0.04$ | 2.9 |
| T127 | $3.8 \pm 0.05$ | $2.0 \pm 0.03$ | 2.9 |
| N128 | $3.9 \pm 0.04$ | $2.8 \pm 0.03$ | 2.9 |
| V129 | $3.6 \pm 0.03$ | $2.3 \pm 0.04$ | 2.9 |
| P130 |                |                | 2.9 |
| V131 | $3.5 \pm 0.03$ | $2.9 \pm 0.04$ | 2.9 |
| K132 |                | $3.1 \pm 0.03$ | 2.8 |
| L133 |                | $3.2 \pm 0.04$ | 2.8 |
| H134 | $4.2 \pm 0.02$ | $2.0 \pm 0.03$ | 2.8 |
| P135 |                |                | 2.8 |
| E136 | $3.3 \pm 0.03$ | $2.2 \pm 0.03$ | 2.7 |
| V137 | $3.7 \pm 0.1$  | $3.1 \pm 0.04$ | 2.7 |
| T138 | $3.8 \pm 0.3$  | $2.5 \pm 0.03$ | 2.6 |
| A139 | $4.2 \pm 0.1$  | $2.3 \pm 0.03$ | 2.6 |
| T140 | $3.6 \pm 0.1$  | $2.2 \pm 0.02$ | 2.5 |
| L141 |                | $2.6 \pm 0.03$ | 2.5 |
| K142 |                | $1.6 \pm 0.02$ | 2.4 |
| V143 | $2.5 \pm 0.03$ | $2.0 \pm 0.03$ | 2.3 |
| H144 | $3.3 \pm 0.06$ | $1.8 \pm 0.04$ | 2.3 |
| V145 | $3.0 \pm 0.05$ | $1.5 \pm 0.02$ | 2.1 |
| T146 | $3.3 \pm 0.05$ | $2.4 \pm 0.03$ | 2.0 |
| E147 |                | $1.3 \pm 0.02$ | 1.9 |
| Q148 | $1.7 \pm 0.03$ | $1.8 \pm 0.02$ | 1.8 |
| K149 | $2.2 \pm 0.05$ | $1.4 \pm 0.02$ | 1.6 |

Figure-S1

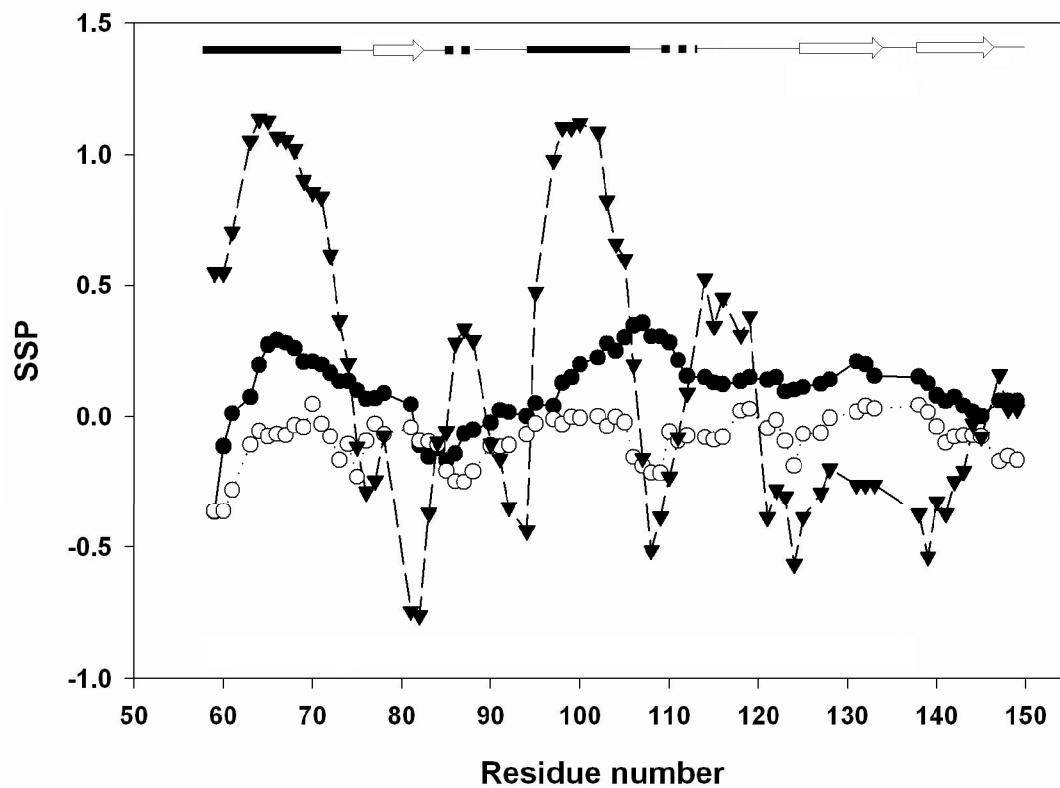



Figure-S2

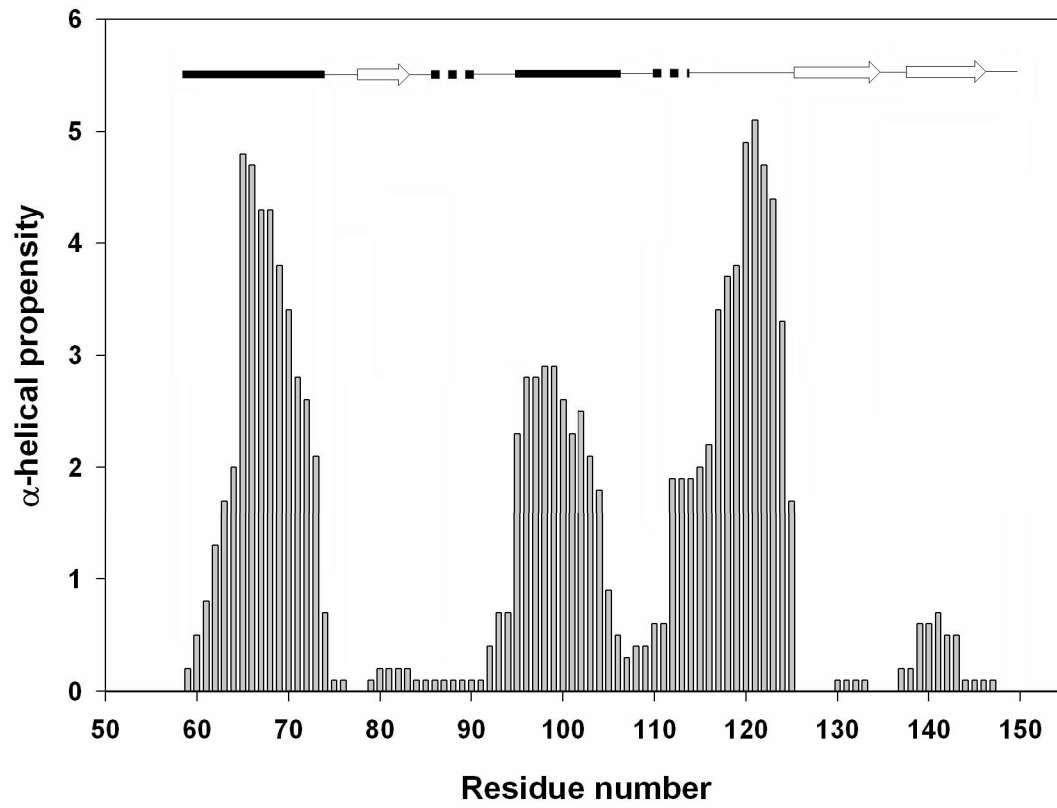

Supplement: NIHMS137575-supplement-Supporting_Info.pdf [file NIHMS137575-supplement-Supporting_Info.pdf]
